# Supplementary material
Source: MDPI journal article supplement (https://www.mdpi.com/1999-4907/13/2/140)
Supplement: s1 [file s1]

**Supplemental material for “Variations of arbuscular mycorrhizal colonization associated with root diameter and hypodermis passages cells across temperate and tropical woody species”**

**Table S1.** Geographical information and soil characteristics of tropical and temperate forests.

|                                             | Tropical forest | Temperate forest |
|---------------------------------------------|-----------------|------------------|
| Longitude (N)                               | 108°36'-109°05' | 127°30'-127°34'  |
| Latitude (E)                                | 18°23'-18°50'   | 45°21'-45°25'    |
| Altitude (m)                                | 809             | 300              |
| Mean annual temperature (°C)                | 23.2            | 2.8              |
| Mean annual precipitation (mm)              | 2266            | 723              |
| Vegetation type                             | Natural forest  | Secondary forest |
| Soil type                                   | Laterite soil   | Haplic Luvisols  |
| pH                                          | 6.32 ± 0.01     | 6.42 ± 0.23      |
| Soil organic carbon (mg g <sup>-1</sup> )   | 29.38 ± 0.94    | 148.60 ± 9.81    |
| Soil total nitrogen (mg g <sup>-1</sup> )   | 1.99 ± 0.02     | 7.62 ± 1.57      |
| Soil total phosphorus (mg g <sup>-1</sup> ) | 0.15 ± 0.01     | 1.82 ± 0.17      |

Values in parentheses are standard errors.

**Table S2.** Root functional traits in 12 tropical species (mean±1 standard error, n=17-26).

| Species                           | Mycorrhizal colonization rate (%) | Cortex thickness (μm) | Number of passage cells (NO.) | Proportion of passage cell (%) | Number of passage cell colonized by fungi (NO.) | Proportion of passage cells colonized by fungi (%) | Root diameter (μm) |
|-----------------------------------|-----------------------------------|-----------------------|-------------------------------|--------------------------------|-------------------------------------------------|----------------------------------------------------|--------------------|
| <i>Viburnum odoratissimum</i>     | 27.62±3.32c                       | 224.15±4.63cd         | 12.12±0.66d                   | 28.18±1.75a                    | 2.59de                                          | 22.58±3.78bcd                                      | 689.65±14.53c      |
| <i>Liquidambar formosana</i>      | 13.99±2.07e                       | 200.59±10.49de        | 19.00±1.48c                   | 27.03±2.08a                    | 3.64cd                                          | 19.75±2.12bcd                                      | 529.45±36.83d      |
| <i>Alangium chinense</i>          | 8.00±1.19fg                       | 131.78±6.52fg         | 13.44±1.04d                   | 21.80±1.14b                    | 2.19e                                           | 17.61±1.8d                                         | 379.95±27.98f      |
| <i>Eucommia ulmoides</i>          | 7.12±1.16fg                       | 175.29±7.77e          | 12.78±0.66d                   | 19.95±1.17bc                   | 2.39de                                          | 19.62±2.91bcd                                      | 545.52±22.98d      |
| <i>Cratogeomys cochinchinense</i> | 21.04±3.27d                       | 67.40±1.91i           | 5.90±0.43e                    | 18.79±0.84c                    | 1.70e                                           | 28.10±5.13abc                                      | 210.35±6.17i       |
| <i>Alseodaphne hainanensis</i>    | 52.60±2.62a                       | 466.36±22.90a         | 37.61±2.58a                   | 24.92±1.22a                    | 7.28a                                           | 20.96±2.55bcd                                      | 1313.10±42.68a     |
| <i>Manglietia hainanensis</i>     | 34.96±2.06b                       | 293.11±8.04b          | 31.91±1.96b                   | 26.78±1.16a                    | 5.09b                                           | 18.68±3.02cd                                       | 790.35±20.94b      |
| <i>Sterculia lanceolata</i>       | 4.16±0.56g                        | 90.09±2.94h           | 6.50±0.29e                    | 21.07±0.77bc                   | 1.79e                                           | 27.29±4.25abc                                      | 285.54±7.52gh      |
| <i>Aporosa dioica</i>             | 20.78±1.51d                       | 77.98±2.04hi          | 5.20±0.31e                    | 20.53±0.92bc                   | 1.76e                                           | 33.79±5.58a                                        | 235.49±6.59hi      |
| <i>Acronychia pedunculata</i>     | 39.34±2.08b                       | 113.57±4.18g          | 7.78±0.44e                    | 20.38±1.05bc                   | 1.70e                                           | 23.08±3.91bcd                                      | 301.58±11.18g      |
| <i>Fortunella margarita</i>       | 38.97±3.82b                       | 232.72±6.60c          | 19.59±1.08c                   | 18.82±0.63bc                   | 2.88de                                          | 14.40±2.69d                                        | 674.57±15.13c      |
| <i>Aquilaria sinensis</i>         | 10.96±2.49ef                      | 150.78±7.78f          | 14.84±0.81d                   | 18.93±0.83bc                   | 4.47bc                                          | 29.56±4.70ab                                       | 455.89±21.29e      |
| Mean                              | 23.30                             | 185.32                | 15.56                         | 22.27                          | 3.12                                            | 22.95                                              | 534.29             |
| CV(%)                             | 69.4                              | 60.5                  | 47.3                          | 16.6                           | 55.1                                            | 24.64                                              | 43.3               |

Note: The sequence of 12 tree species was consistent with Table 1. Different lower letters represent the significant interspecific difference among different species.

**Table S3** Root functional traits in 10 temperature species (mean±1 standard error, n=26-31).

| Species                       | Mycorrhizal<br>colonization<br>rate (%) | Cortex<br>thickness<br>( $\mu\text{m}$ ) | Number of<br>passage cells<br>(NO.) | Proportion<br>of passage<br>cell (%) | Number of<br>passage cells<br>colonized by<br>fungi (NO.) | Proportion of<br>passage cells<br>colonized by<br>fungi (%) | Root<br>diameter<br>( $\mu\text{m}$ ) |
|-------------------------------|-----------------------------------------|------------------------------------------|-------------------------------------|--------------------------------------|-----------------------------------------------------------|-------------------------------------------------------------|---------------------------------------|
| <i>Viburnum opulus</i>        | 62.89±2.38a                             | 178.13±4.32b                             | 17.88±1.11a                         | 29.10±1.14c                          | 5.97b                                                     | 33.51±3.86b                                                 | 546.31±13.87a                         |
| <i>Lonicera maackii</i>       | 15.62±2.55cd                            | 68.41±2.22fg                             | 6.53±0.69e                          | 17.02±1.24e                          | 0.77d                                                     | 12.78±2.44ef                                                | 204.52±6.58f                          |
| <i>Euonymus alatus</i>        | 15.12±1.46cd                            | 84.77±1.85e                              | 6.50±0.28e                          | 21.65±0.78d                          | 1.23cd                                                    | 18.90±2.92cde                                               | 261.04±6.26d                          |
| <i>Fraxinus mandshurica</i>   | 12.10±1.95de                            | 85.72±1.68e                              | 9.00±0.36c                          | 20.49±0.70d                          | 1.87c                                                     | 20.93±2.72cd                                                | 260.09±5.05d                          |
| <i>Syringa reticulata</i>     | 8.98±1.55e                              | 65.42±1.01gh                             | 6.13±0.31e                          | 19.84±0.74d                          | 1.43cd                                                    | 25.81±4.23bc                                                | 195.39±3.50f                          |
| <i>Phellodendron amurense</i> | 61.68±0.86a                             | 217.33±5.54a                             | 17.13±1.06a                         | 20.38±1.05d                          | 5.97b                                                     | 33.54±2.91b                                                 | 566.75±13.97a                         |
| <i>Acer mandshuricum</i>      | 30.18±1.63b                             | 73.05±2.07f                              | 6.40±0.26e                          | 22.56±0.51d                          | 1.27cd                                                    | 18.91±3.13cde                                               | 228.67±5.47e                          |
| <i>Acer ginnala</i>           | 16.01±0.88cd                            | 59.19±2.39h                              | 6.97±0.36de                         | 32.74±1.73b                          | 0.73d                                                     | 10.53±1.88f                                                 | 193.73±6.21f                          |
| <i>Acer mono</i>              | 19.57±1.24c                             | 106.40±4.93d                             | 7.93±0.31cd                         | 21.90±0.64d                          | 1.37cd                                                    | 16.39±2.40def                                               | 310.20±9.25c                          |
| <i>Schisandra chinensis</i>   | 66.27±1.37a                             | 130.99±2.07c                             | 14.93±0.48b                         | 43.19±1.22a                          | 13.60a                                                    | 90.41±2.80a                                                 | 400.36±4.66b                          |
| Mean                          | 30.84                                   | 106.94                                   | 9.94                                | 24.89                                | 3.42                                                      | 28.17                                                       | 316.71                                |
| CV(%)                         | 75.6                                    | 49.7                                     | 47.9                                | 31.9                                 | 119.7                                                     | 82.39                                                       | 44.5                                  |

Note: The sequence of 10 tree species was consistent with Table 1. Different lower letters represent the significant interspecific difference among different species.

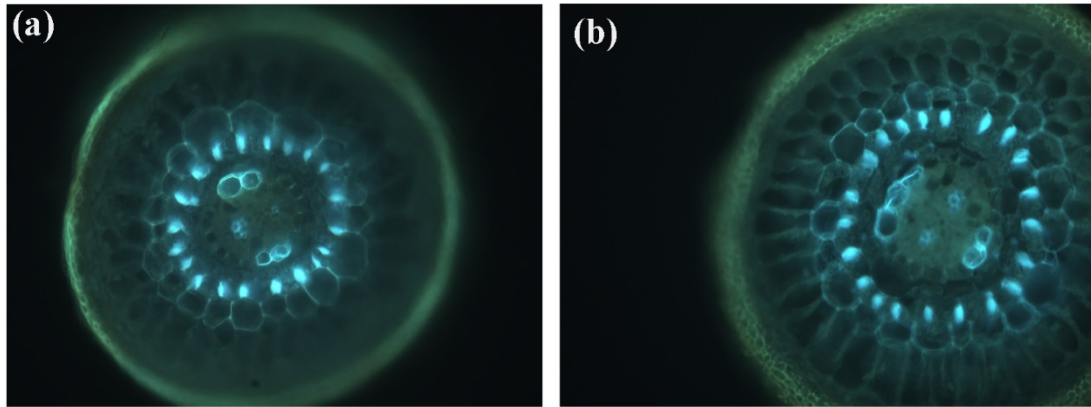**Figure S1.** Cross-section of ectomycorrhizal root of *Betula platyphylla* (a,b).

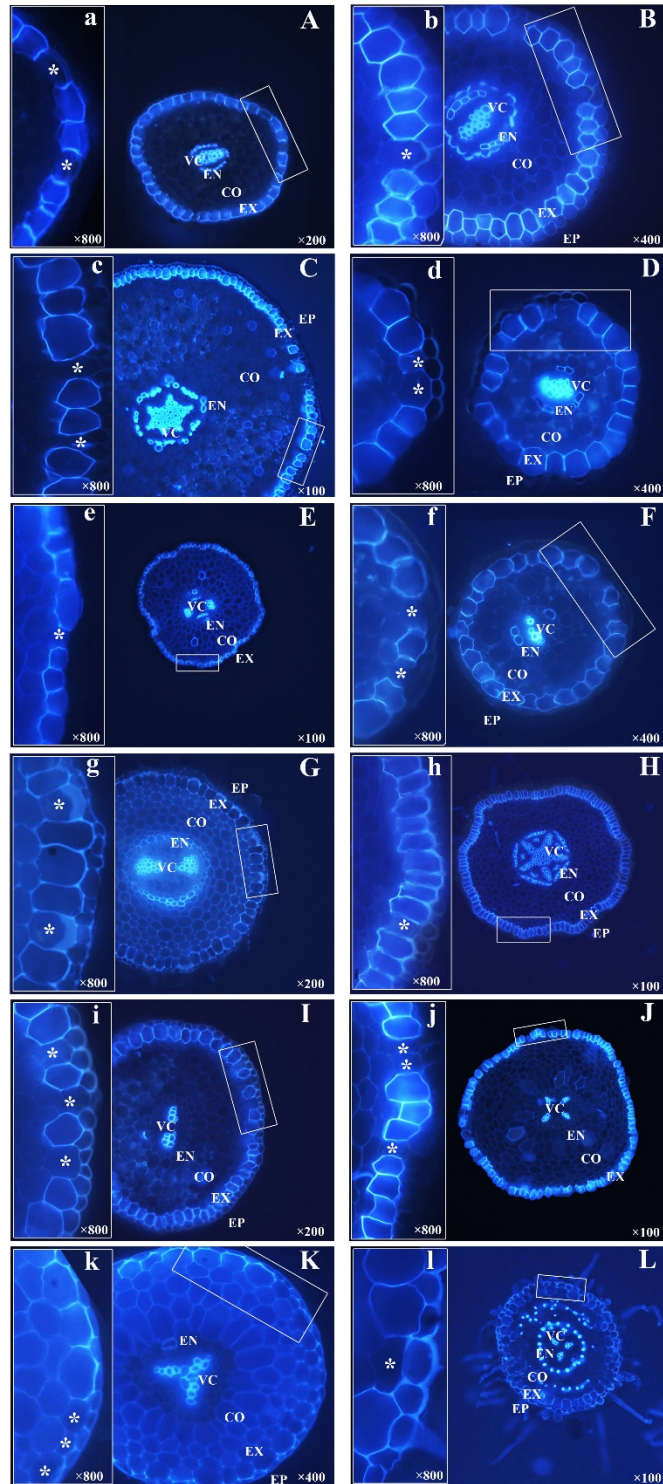

**Table S2.** Anatomical structures of the root tips of 12 Chinese tropical woody species. **A,a:** *Acronychia pedunculata*; **B,b:** *Alangium chinense*; **C,c:** *Alseodaphne hainanensis*; **D,d:** *Aporosa dioica*; **E,e:** *Aquilaria sinensis*; **F,f:** *Cratoxylum cochinchinense*; **G,g:** *Eucommia ulmoides*; **H,h:** *Fortunella margarita*; **I,i:** *Liquidambar formosana*; **J,j:** *Manglietia hainanensis*; **K,k:** *Sterculia lanceolata*; **L,l:** *Viburnum odoratissimum*. EP, epidermis; EX, exodermis; CO, cortex; VC, vascular cylinder (stele); EN, endodermis. Asterisk (\*) indicates the passage cell.

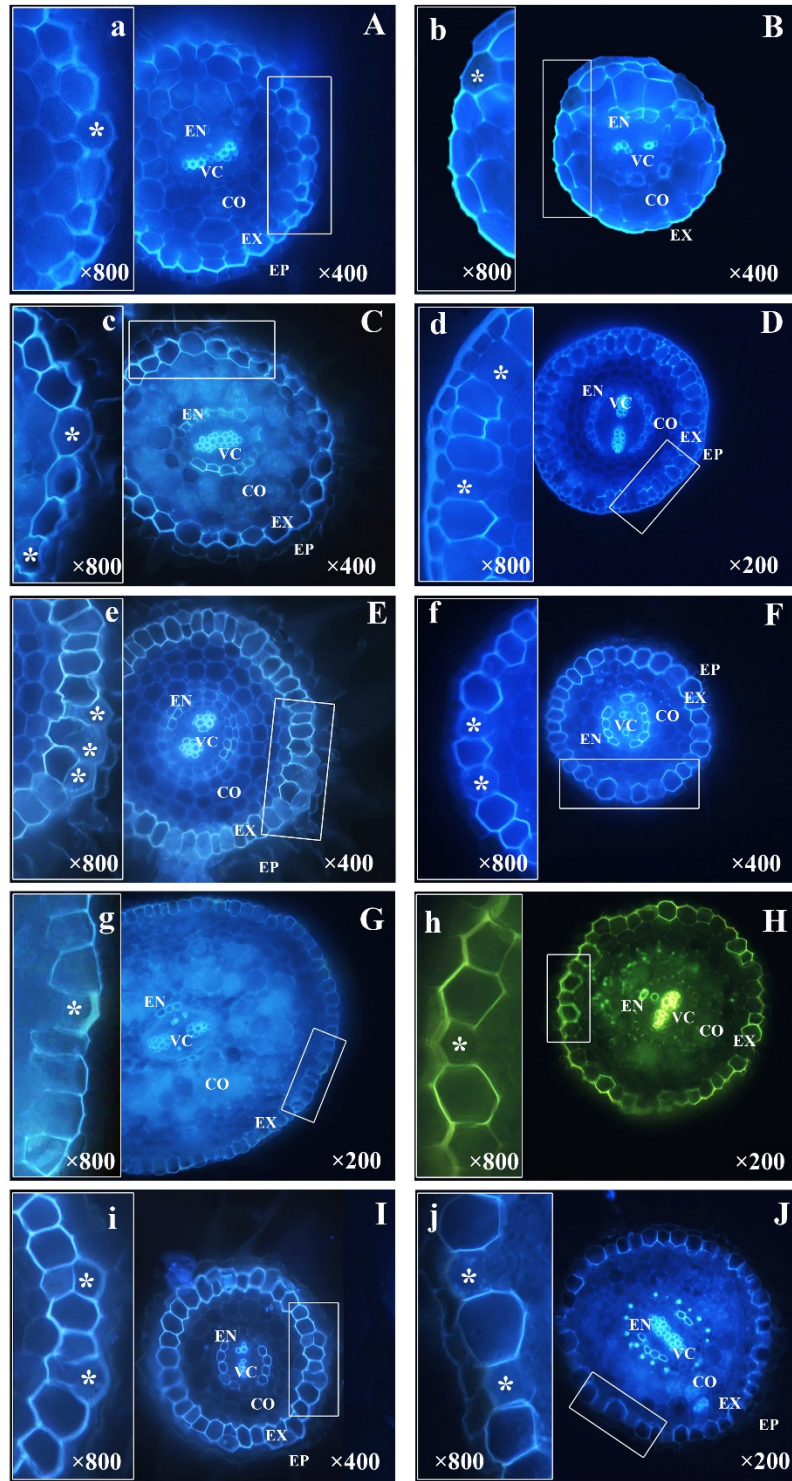

**Figure S3.** Anatomical structures of the root tips of 10 Chinese temperate woody species. **A,a:** *Acer mandshuricum*; **B,b:** *Acer ginnala*; **C,c:** *Acer mono*; **D,d:** *Euonymus alatus*; **E,e:** *Fraxinus mandshurica*; **F,f:** *Lonicera maackii*; **G,g:** *Phellodendron amurense*; **H,h:** *Schisandra chinensis*; **I,i:** *Syringa amurensis*; **J,j:** *Viburnum calvescens*. EP, epidermis; EX, exodermis; CO, cortex; EN, endodermis; VC, vascular cylinder (stele); Asterisk (\*) indicates the passage cell.

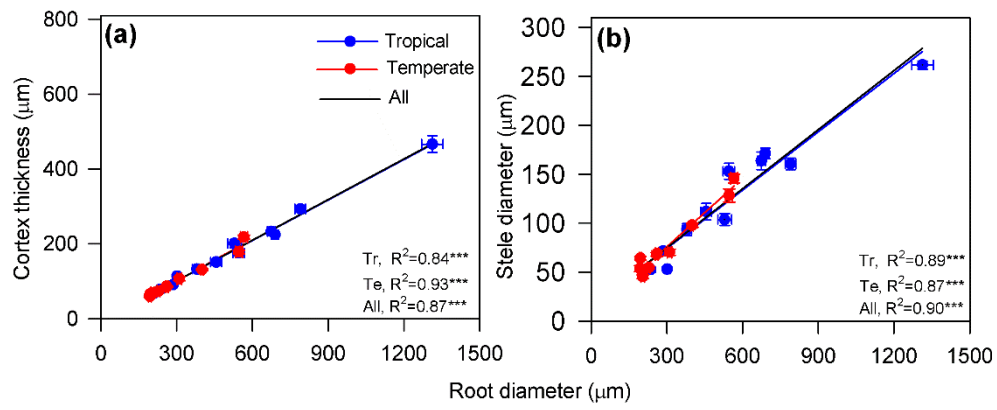

**Figure S4.** The relationship between root diameter and cortex thickness (a) and stele diameter (b). Tr, Te and All represent tropical, temperate and total species, respectively. \*  $p < 0.05$ , \*\*  $p < 0.01$ , \*\*\*  $p < 0.001$ .
